# Supplementary material for: A transformation process and mechanism between the α-conformation and β-conformation of conjugated polymer PFO in precursor solution
Source: Royal Society of Chemistry journal article supplement (doi:10.1039/c5sm00074b), 2015-01-01
Supplement: c5sm00074b1.pdf [file c5sm00074b1.pdf]

# Transformation Process and Mechanism between the $\alpha$ - Conformation and $\beta$ -Conformation of Conjugated Polymer PFO in Precursor Solution

*Long Huang, Tao Li, Bo Liu, Lili Zhang, Zeming Bai, Xiaona Li, Xinan Huang, Dan Lu\**

State Key Laboratory of Supramolecular Structure and Materials, College of Chemistry, Jilin  
University, 2699 Qianjin Avenue, Changchun, 130012, China

# Supporting Information

## 1. The calculation method of the proportion of $\beta$ -conformation in PFO solution<sup>1</sup>

The proportion of  $\beta$ -conformation in PFO solution can be calculated according to Lambert-Beer's law (Eq. S2), where  $c_\alpha$  and  $c_\beta$  are the concentrations of  $\alpha$ -conformation and  $\beta$ -conformation, respectively,  $A$  (obtained from experiments) is the absorbency and  $\varepsilon$  is the absorption coefficient. In UV-vis absorption spectra of PFO solutions, it is difficult to obtain the  $\varepsilon$  for  $\alpha$ -conformation and  $\beta$ -conformation. Thus we used the method of molecular simulation to the absorption spectra to calculate the proportion of  $\varepsilon_\beta/\varepsilon_\alpha$ .<sup>2</sup>

$$\alpha\% + \beta\% = 1 \quad (\text{S1})$$

$$\beta\% = \frac{c_\beta}{c_\beta + c_\alpha} = \frac{A_\beta \times \varepsilon_\alpha}{A_\beta \times \varepsilon_\alpha + A_\alpha \times \varepsilon_\beta} \quad (\text{S2})$$

By defining six monomer units as the conjugation length,<sup>3</sup> we optimized the symmetry geometries of PFO chains for the approximate calculation of  $\varepsilon$  using Density Functional Theory (DFT).<sup>4</sup> To calculate the oscillator strengths ( $f$ ), Time-Dependent Density Functional Theory (TD-DFT) was used,<sup>5</sup> as this method has been found to give reliable results.<sup>6</sup> DFT and TD-DFT are both with a B3LYP hybrid functional basis set level of 6-31G\*.<sup>7</sup> All calculations were performed using the Gaussian 03 package.<sup>6</sup> The oscillator strengths ( $f$ ) of the two conformations are 4.46 for  $\alpha$ -conformation at 386 nm and 4.83 for  $\beta$ -conformation at 437 nm. Thus, the proportion of  $\varepsilon_\beta/\varepsilon_\alpha$  can be obtained from Eq. S3 and Eq. S4, where  $k$  is a constant and  $\nu$  is the vibration frequency of two conformations. We can calculate the proportion of  $\beta$ -conformation in each UV-vis absorption spectra of PFO solutions using Eq. S2 and Eq. S4.

$$f = k \int \varepsilon d\nu, \quad f \propto \varepsilon \quad (\text{S3})$$

$$\frac{\varepsilon_{\beta}}{\varepsilon_{\alpha}} = \frac{f_{\beta}}{f_{\alpha}} = \frac{4.83}{4.46} = 1.08 \quad (\text{S4})$$

## REFERENCES

- (1) Huang, L.; Huang, X. N.; Sun, G. N.; Gu, C.; Lu D.; Ma, Y. G. *J. Phys. Chem. C* **2012**, *116*, 7993-7999.
- (2) Gu, C.; Tang, S.; Yang, B.; Liu, S. J.; Lv, Y.; Wang, H.; Yang, S. M.; Hanif, M.; Lu, D.; Shen, F. Z.; Ma, Y. G. *Electrochim. Acta* **2009**, *54*, 7006-7011.
- (3) Ng, M. F.; Sun, S. L.; Zhang, R. Q. *J. Appl. Phys.* **2005**, *97*, 103513.
- (4) Hohenberg, P.; Kohn, W. *Phys. Rev. B* **1964**, *136*, 864-871.
- (5) Runge, E.; Gross, E. K. U. *Phys. Rev. Lett.* **1984**, *52*, 997-1000.
- (6) Hirata, S.; Lee, T. J.; Gordon, M. H. *J. Chem. Phys.* **1999**, *111*, 8904-8912.
- (7) Lee, C.; Yang, W.; Parr, R. G. *Phys. Rev. B* **1988**, *37*, 785-789.

## 2. Light emission spectra of the transformation process from $\alpha$ -conformation to $\beta$ -conformation

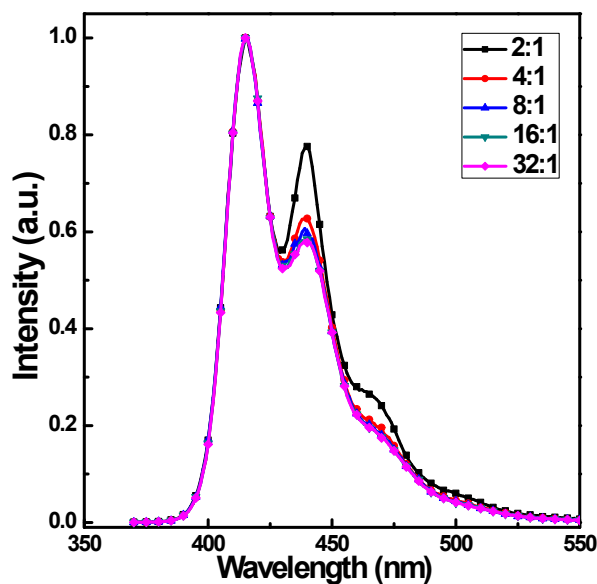

**Fig.S1** Normalized light emission spectra of five PFO samples with different toluene/ethanol ratios: 32:1, 16:1, 8:1, 4:1, 2:1. All the five curves were normalized at the 415 nm.

From Fig.S1, it can be seen that the corresponding light emission spectra is well consistent with the UV-vis absorption spectra Fig.2 (a) in the transformation process from  $\alpha$ -conformation to  $\beta$ -conformation.
